# Supplementary material for: Determination of association constants and FRET in hydrazide-based molecular duplex strands
Source: Royal Society of Chemistry journal article supplement (doi:10.1039/d0qo00746c), 2020-01-01
Supplement: d0qo00746c1.pdf [file d0qo00746c1.pdf]

## **Electronic Supplementary Information**

# **Determination of association constants and FRET in hydrazide-based molecular duplex strands**

Shi-Chang Gao, Kang Wan, Xu Fang, Yong-Xue Li, Min Xue, and Yong Yang\*

School of Science, Zhejiang Sci-Tech University, Hangzhou 310018, China.

Email: yangyong@zstu.edu.cn

## General Information for spectroscopic measurements

Commercial  $\text{CHCl}_3$  was first washed with deionized water three times and then dried over anhydrous  $\text{Na}_2\text{SO}_4$ . Fresh  $\text{CHCl}_3$  was distilled from  $\text{P}_2\text{O}_5$  before spectroscopic measurements.  $\text{CH}_3\text{OH}$  for spectroscopy measurement was distilled. UV-vis and FL spectra were recorded on an Olis DSM 172 spectrophotometer. Temperature was controlled using Northwest Quantum (Peltier controlled cell). 10 mm  $\times$  10 mm cuvettes were used. Usually data were collected at 1 nm intervals. The slitwidth was fixed at 1 mm and the integration time was set as 0.1 s.  $\lambda_{\text{ex}} = 345$  nm was used to excite pyrene fluorophore and  $\lambda_{\text{ex}} = 418$  nm for perylene fluorophore.

The dimerization constant was obtained by fitting the pyrene excimer intensities, using the following protocol. The excimer ( $\lambda_{\text{max}} = 474$  nm) intensity was integrated from 470 nm to 600 nm to exclude as much of the monomer emission bands ( $\lambda_{\text{max}} = 378$  nm and  $\lambda_{\text{max}} = 398$  nm) as possible.<sup>S1-3</sup>

$$\begin{aligned} \text{Model} \quad & \text{A} + \text{A} \rightleftharpoons \text{A}_2 \\ K_{\text{dim}} = \frac{[\text{A}_2]}{[\text{A}]^2} &= \frac{[\text{A}_2]}{([\text{A}]_0 - 2[\text{A}_2])^2} \\ [\text{A}] &= [\text{A}]_0 - 2[\text{A}_2] \\ [\text{A}_2] &= \frac{4K_{\text{dim}}[\text{A}]_0 + 1 - \sqrt{8K_{\text{dim}}[\text{A}]_0 + 1}}{8K_{\text{dim}}} \quad \text{Eq. S1} \end{aligned}$$

$$\begin{aligned} I_{\text{excimer}} &= k[\text{A}_2] = k \frac{4K_{\text{dim}}[\text{A}]_0 + 1 - \sqrt{8K_{\text{dim}}[\text{A}]_0 + 1}}{8K_{\text{dim}}} \\ \frac{I_{\text{excimer}}}{[\text{A}]_0} &= k \frac{4K_{\text{dim}}[\text{A}]_0 + 1 - \sqrt{8K_{\text{dim}}[\text{A}]_0 + 1}}{8K_{\text{dim}}[\text{A}]_0} \quad \text{Eq. S2} \end{aligned}$$

$[\text{A}]$ : the concentration of free monomer

$[\text{A}]_0$ : the total concentration

$[\text{A}_2]$ : the concentration of molecular duplex strand

$K_{\text{dim}}$ : the dimerization constant

$I_{\text{excimer}}$ : the intensity of the excimer band

$k$ : constant

The determination of the association constant *via* titration of a non-fluorescent oligomers into a pyrene labelled oligomer was based on the following protocol.

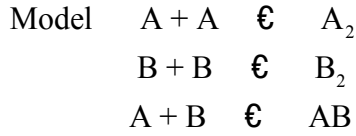

$$K_A = \frac{[A_2]}{[A]^2} \quad K_B = \frac{[B_2]}{[B]^2} \quad K_{AB} = \frac{[AB]}{[A][B]}$$

$$[A]_0 = [A] + 2[A_2] + [AB]$$

$$[B]_0 = [B] + 2[B_2] + [AB]$$

$$[B_2] = K_B[B]^2$$

$$2K_B[B]^2 + [B] + [AB] - [B]_0 = 0$$

$$[B] = \frac{-1 + \sqrt{1 + 8K_B([B]_0 - [AB])}}{4K_B}$$

$$\frac{[AB]}{[A]} = K_{AB}[B] = \frac{K_{AB}}{4K_B}(-1 + \sqrt{1 + 8K_B([B]_0 - [AB])}) \quad \text{Eq. S3}$$

$$[A] = \sqrt{\frac{[A_2]}{K_A}} \quad [AB] = [A]_0 - [A] - 2[A_2] = [A]_0 - \sqrt{\frac{[A_2]}{K_A}} - 2[A_2] \quad \text{Eq. S4}$$

[A]: the monomer concentration of free pyrene labelled oligomer

[A]<sub>0</sub>: the total concentration of pyrene labelled oligomer

[A<sub>2</sub>]: the concentration of molecular duplex strand from pyrene labelled oligomer

[B]: the monomer concentration of non-fluorescent oligomer

[B]<sub>0</sub>: the total concentration of non-fluorescent oligomer

[B<sub>2</sub>]: the concentration of molecular duplex strand from non-fluorescent oligomer

K<sub>A</sub>: the dimerization constant for pyrene labelled oligomer

K<sub>B</sub>: the dimerization constant for non-fluorescent oligomer

K<sub>AB</sub>: the association constant for heteroduplex strand

When [B]<sub>0</sub> = 0, calculate [A<sub>2</sub>]<sub>0</sub> according to Eq. S1 and integrate from 470 nm to 600 nm to get the corresponding I<sub>excimer, 0</sub>

[A<sub>2</sub>] is proportional to the excimer intensity I<sub>excimer</sub>

$$\text{At a specific } [B]_0, [A_2] = [A_2]_0 \times \frac{I_{\text{excimer}}}{I_{\text{excimer}, 0}}$$

According to Eq. S4, Calculate [A], [AB],  $\frac{[AB]}{[A]}$ , [B]<sub>0</sub> - [AB]

Fitting Eq. S3 to get K<sub>B</sub> & K<sub>AB</sub>

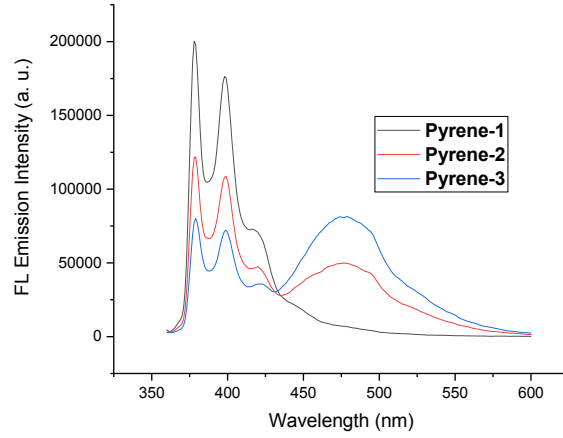

Figure S1 FL emission spectra for **Pyrene-1** ~ **Pyrene-3**, each  $4 \times 10^{-7}$  M in freshly distilled  $\text{CHCl}_3$ , 25 °C,  $\lambda_{\text{ex}} = 345$  nm.

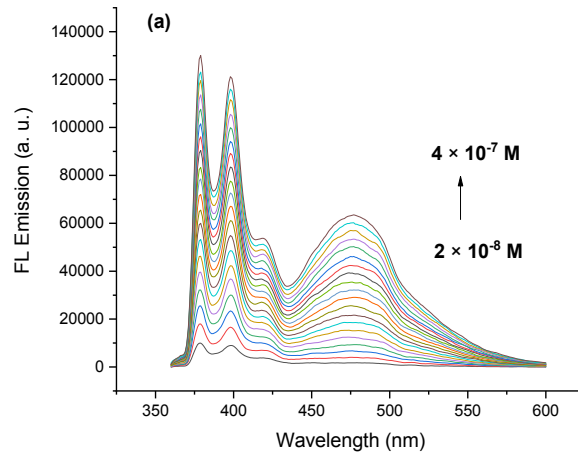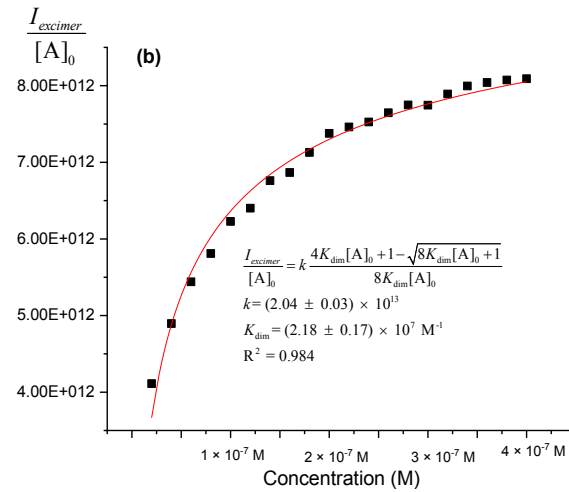

Figure S2 (a) Concentration dependent FL emission spectra for **Pyrene-2**, from  $2 \times 10^{-8}$  M to  $4 \times 10^{-7}$  M in freshly distilled  $\text{CH}_2\text{Cl}_2$ , 20 °C,  $\lambda_{\text{ex}} = 345$  nm. (b) Nonlinear fitting the excimer intensity data, yielding  $K_{\text{dim}} = (2.18 \pm 0.17) \times 10^7 \text{ M}^{-1}$  for **Pyrene-2**·**Pyrene-2**.

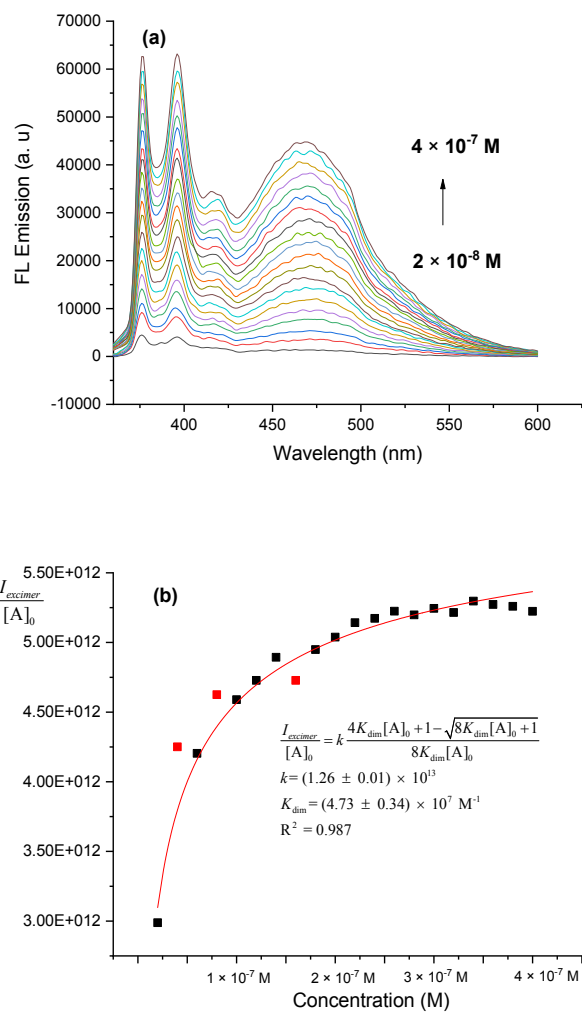

Figure S3 (a) Concentration dependent FL emission spectra for **Pyrene-2**, from  $2 \times 10^{-8}$  M to  $4 \times 10^{-7}$  M in freshly distilled toluene, 20 °C,  $\lambda_{\text{ex}} = 345$  nm. (b) Nonlinear fitting the excimer intensity data, yielding  $K_{\text{dim}} = (4.73 \pm 0.34) \times 10^7 \text{ M}^{-1}$  for **Pyrene-2**•**Pyrene-2**.

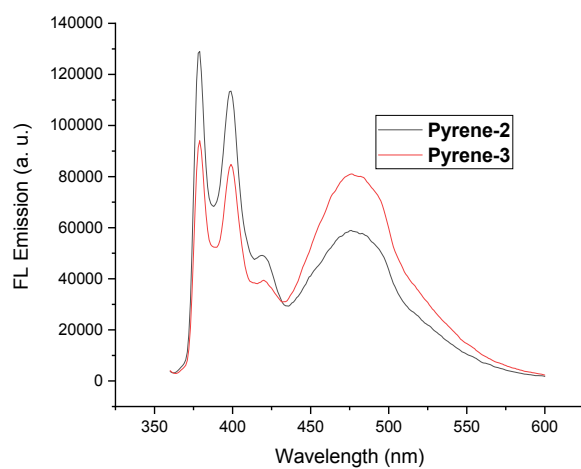

Figure S4 FL emission spectra for oligomer **Pyrene-2** and **Pyrene-3**, recorded on the same instrument conditions, each  $4 \times 10^{-7}$  M in freshly distilled  $\text{CHCl}_3$ , 20 °C,  $\lambda_{\text{ex}} = 345$  nm.

$$[A_2] = \frac{4K_{\text{dim}}[A]_0 + 1 - \sqrt{8K_{\text{dim}}[A]_0 + 1}}{8K_{\text{dim}}} \quad \text{Eq. S1}$$

$$K_{\text{dim, Pyrene-2}} = 9.48 \times 10^6 \text{ M}^{-1} \quad [\text{Pyrene-2}]_0 = 4 \times 10^{-7} \text{ M}^{-1}$$

$$[\text{Pyrene-2gPyrene-2}] = 1.393 \times 10^{-7} \text{ M} \quad I_{\text{excimer, Pyrene-2}} = 3042220$$

$$[\text{Pyrene-2}] = 1.214 \times 10^{-7} \text{ M}$$

$$I_{\text{excimer, Pyrene-3}} = 4222670$$

$$[\text{Pyrene-3gPyrene-3}] = \frac{4222670}{3042220} \times 1.393 \times 10^{-7} = 1.934 \times 10^{-7} \text{ M}$$

$$[\text{Pyrene-3}] = 1.32 \times 10^{-8} \text{ M}$$

$$K_{\text{dim, Pyrene-3}} = \frac{[\text{Pyrene-3gPyrene-3}]}{[\text{Pyrene-3}]^2} = 1.11 \times 10^9 \text{ M}^{-1}$$

Figure S5 Determining the dimerization constant for **Pyrene-3•Pyrene-3** by comparing the excimer emission intensities of oligomers **Pyrene-2** and **Pyrene-3** on the same measurement conditions. The excimer emission band ( $\lambda_{\text{max}} = 474 \text{ nm}$ ) was integrated from 470 nm to 600 nm, to exclude as much of the monomer emission bands ( $\lambda_{\text{max}} = 378 \text{ nm}$  and  $\lambda_{\text{max}} = 398 \text{ nm}$ ) as possible.

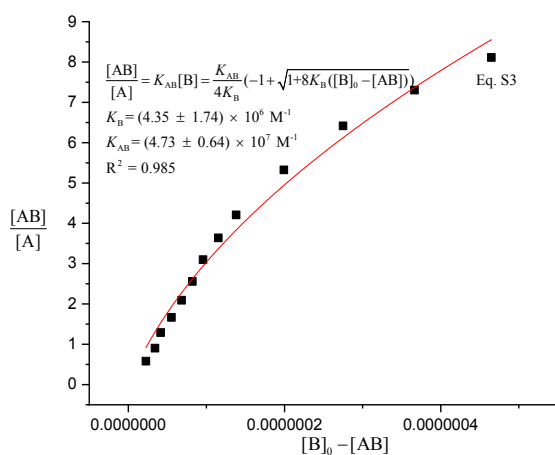

Figure S6 Fitting the excimer intensity data according to Eq. S3, yielding  $K_{\text{dim}} = (4.35 \pm 1.74) \times 10^6 \text{ M}^{-1}$  for six-hydrogen-bonded homoduplex **NonF-1•NonF-1** and  $K_a = (4.73 \pm 0.64) \times 10^7 \text{ M}^{-1}$  for eight-hydrogen-bonded heteroduplex **Pyrene-2•NonF-1**.

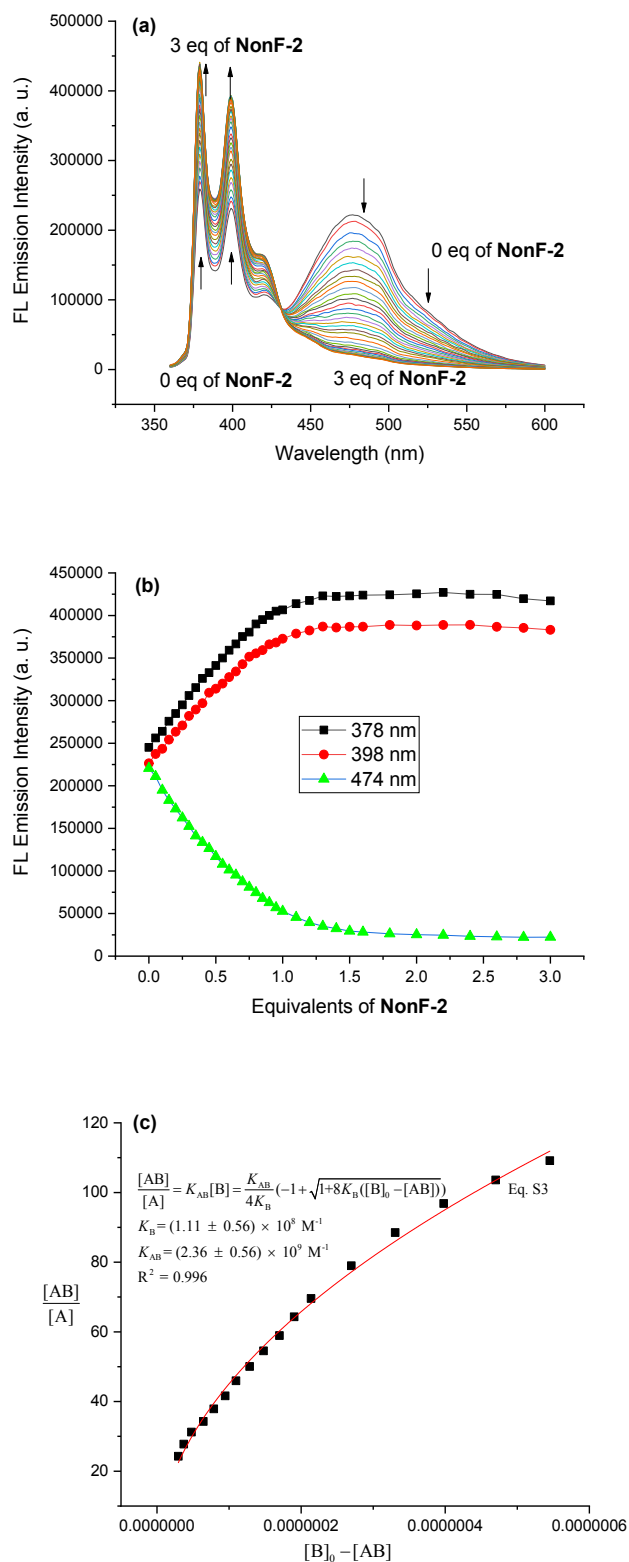

Figure S7 (a) FL emission spectra of **Pyrene-3**,  $8 \times 10^{-7}$  M in  $\text{CHCl}_3$ , 293 K, when titrated with a non-fluorescent oligomer **NonF-2** (0 ~ 3 equivalents),  $\lambda_{\text{ex}} = 345$  nm,  $\lambda_{\text{isobestic}} = 430$  nm. (b) FL emission intensity changes for pyrene excimer emission ( $\lambda = 474$  nm) and monomer emission ( $\lambda = 378$  nm and  $\lambda = 398$  nm) during titration. (c) Fitting the excimer intensity data according to Eq. S3, yielding  $K_{\text{dim}} = (1.11 \pm 0.56) \times 10^8 \text{ M}^{-1}$  for ten-hydrogen-bonded homoduplex **NonF-2•NonF-2** and  $K_{\text{a}} = (2.36 \pm 0.56) \times 10^9 \text{ M}^{-1}$  for twelve-hydrogen-bonded heteroduplex **Pyrene-3•NonF-2**.

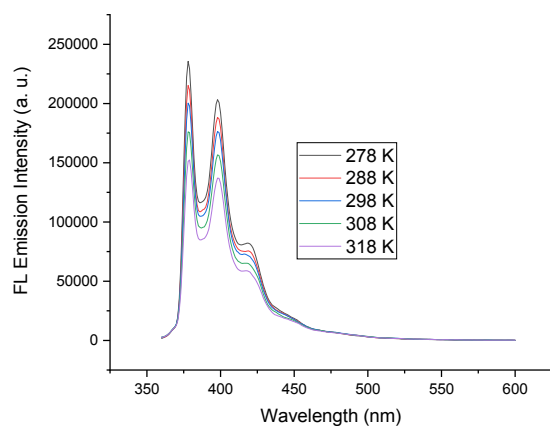

Figure S8 FL emission spectra for **Pyrene-1**,  $4 \times 10^{-7}$  M in freshly distilled  $\text{CHCl}_3$ , at different temperatures.

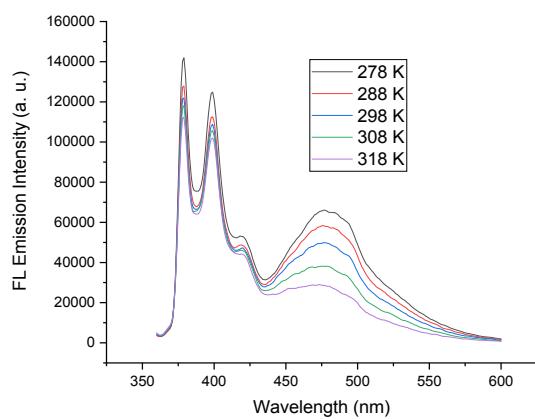

Figure S9 FL emission spectra for **Pyrene-2**,  $4 \times 10^{-7}$  M in freshly distilled  $\text{CHCl}_3$ , at different temperatures.

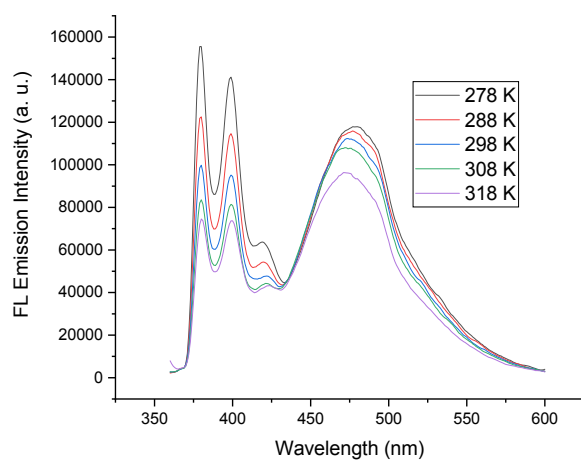

Figure S10 FL emission spectra for **Pyrene-3**,  $4 \times 10^{-7}$  M in freshly distilled  $\text{CHCl}_3$ , at different temperatures.



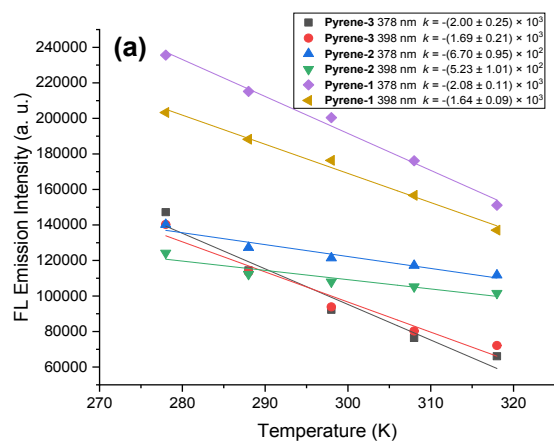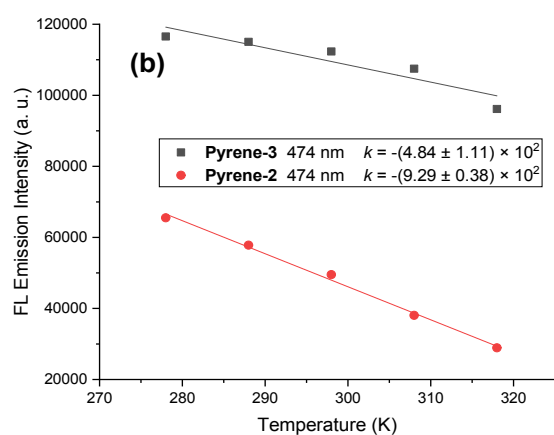

Figure S11 (a) Pyrene monomer emission ( $\lambda_{\text{max}} = 378 \text{ nm}$  and  $\lambda_{\text{max}} = 398 \text{ nm}$ ) intensity decreased with increasing of temperature, with temperature coefficient indicated. (b) Pyrene excimer emission ( $\lambda_{\text{max}} = 474 \text{ nm}$ ) intensity changes with temperature, with temperature coefficient indicated.

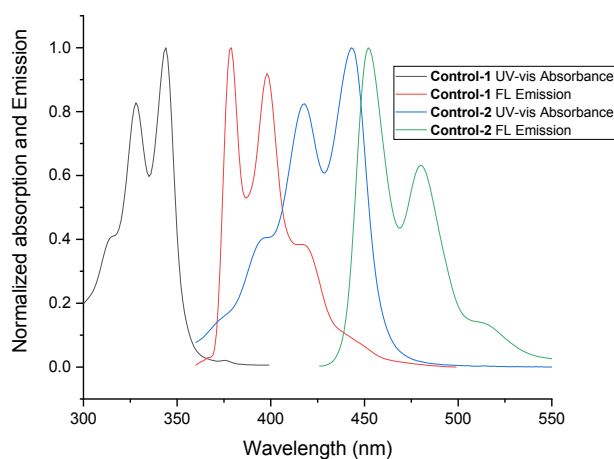

Figure S12 Normalized UV-vis absorption and FL emission spectra for pyrene (**Control-1**) and perylene (**Control-2**) labelled controls, 20 °C. Conditions for UV-vis measurements: each  $10^{-5} \text{ M}$  in freshly distilled  $\text{CHCl}_3$ ; Conditions for FL emission measurements: each  $5 \times 10^{-6} \text{ M}$  in freshly distilled  $\text{CHCl}_3$ ,  $\lambda_{\text{ex}} = 345 \text{ nm}$  for **Control-1** and  $\lambda_{\text{ex}} = 418 \text{ nm}$  for **Control-2**.

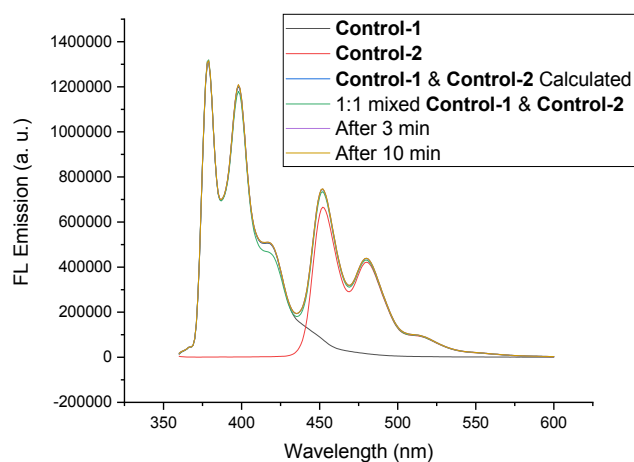

Figure S13 FL emission spectra for pyrene (**Control-1**) and perylene (**Control-2**) labelled controls, 20 °C, each  $5 \times 10^{-6}$  M in freshly distilled  $\text{CHCl}_3$ ,  $\lambda_{\text{ex}} = 345$  nm.

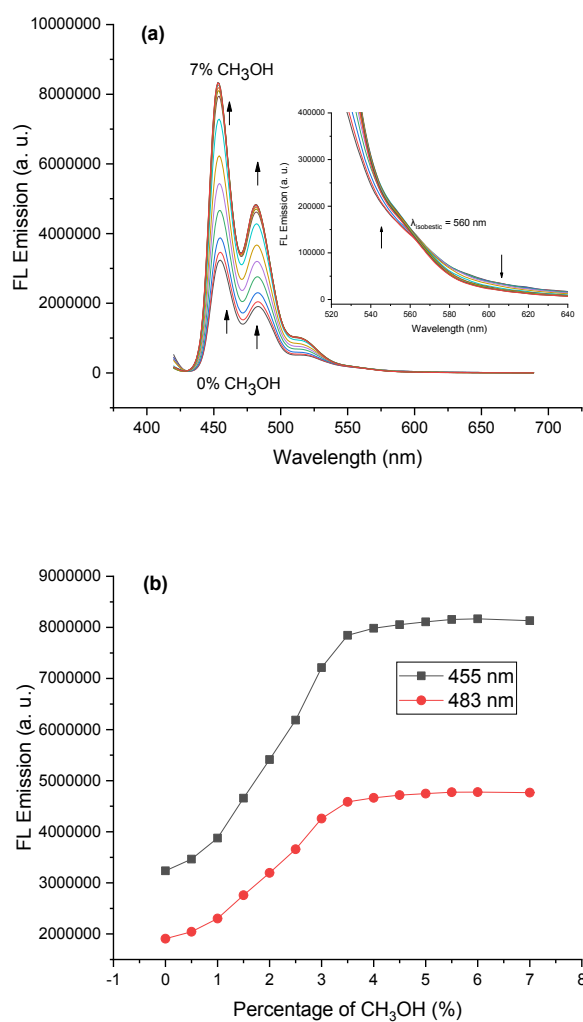

Figure S14 (a) FL emission spectra for **Perylene-1**, 2  $\mu\text{M}$  in in freshly distilled  $\text{CHCl}_3$ , titrated with different percentage of  $\text{CH}_3\text{OH}$ ,  $\lambda_{\text{ex}} = 418$  nm, 20 °C. The insert shows the expanded excimer emission band. (b) FL intensity changes for perylene monomer emission at  $\lambda_{\text{max}} = 455$  nm and  $\lambda_{\text{max}} = 483$  nm. 3.5%  $\text{CH}_3\text{OH}$  in  $\text{CHCl}_3$  can recover the monomer emission completely.

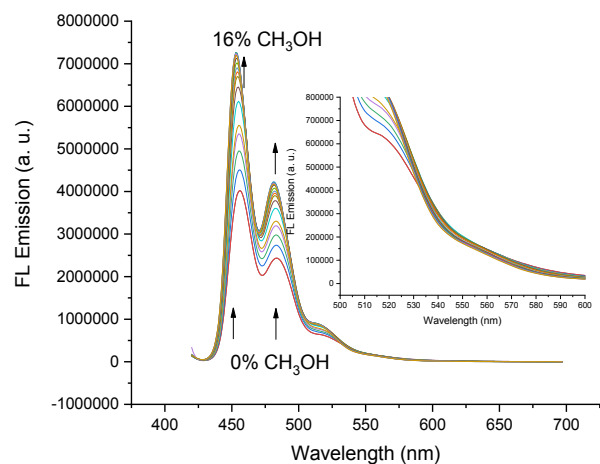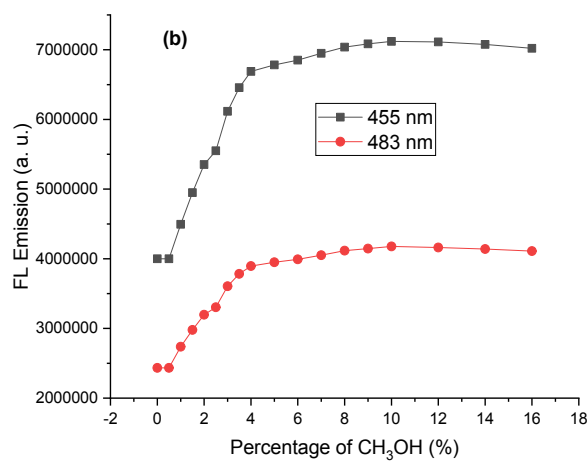

Figure S15 (a) FL emission spectra for **Perylene-2**, 2  $\mu\text{M}$  in freshly distilled  $\text{CHCl}_3$ , titrated with different percentage of  $\text{CH}_3\text{OH}$ ,  $\lambda_{\text{ex}} = 418$  nm, 20  $^\circ\text{C}$ . The insert shows the expanded excimer emission band. (b) FL intensity changes for perylene monomer emission at  $\lambda_{\text{max}} = 455$  nm and  $\lambda_{\text{max}} = 483$  nm. 4%  $\text{CH}_3\text{OH}$  in  $\text{CHCl}_3$  can recover the monomer emission completely.

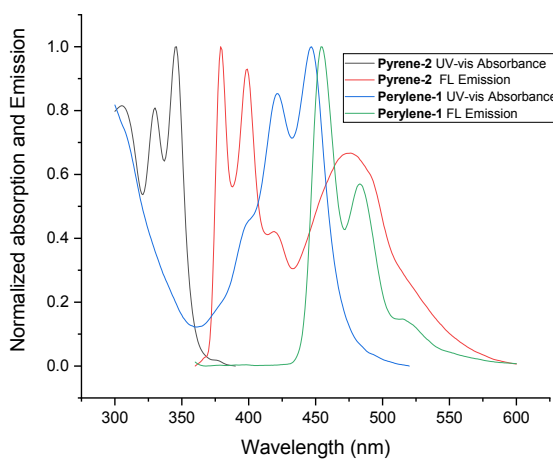

Figure S16 Normalized UV-vis absorption and FL emission spectra for **Pyrene-2** & **Perylene-1** FRET pair, 20 °C. Conditions for UV-vis measurements: each  $10^{-5}$  M in freshly distilled  $\text{CHCl}_3$ ; Conditions for FL emission measurements: each  $10^{-6}$  M in freshly distilled  $\text{CHCl}_3$ ,  $\lambda_{\text{ex}} = 345$  nm for **Pyrene-2** and  $\lambda_{\text{ex}} = 418$  nm for **Perylene-1**.

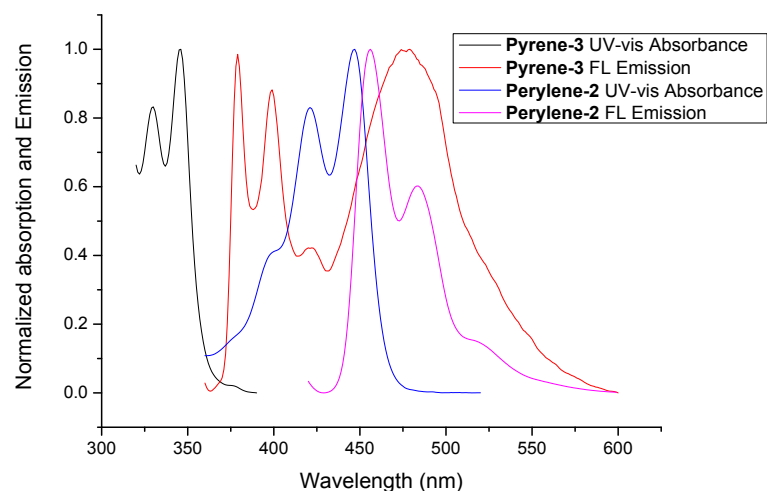

Figure S17 Normalized UV-vis absorption and FL emission spectra for **Pyrene-3** & **Perylene-2** FRET pair, 20 °C. Conditions for UV-vis measurements: each  $10^{-5}$  M in freshly distilled  $\text{CHCl}_3$ ; Conditions for FL emission measurements: each  $10^{-6}$  M in freshly distilled  $\text{CHCl}_3$ ,  $\lambda_{\text{ex}} = 345$  nm for **Pyrene-3** and  $\lambda_{\text{ex}} = 418$  nm for **Perylene-2**.

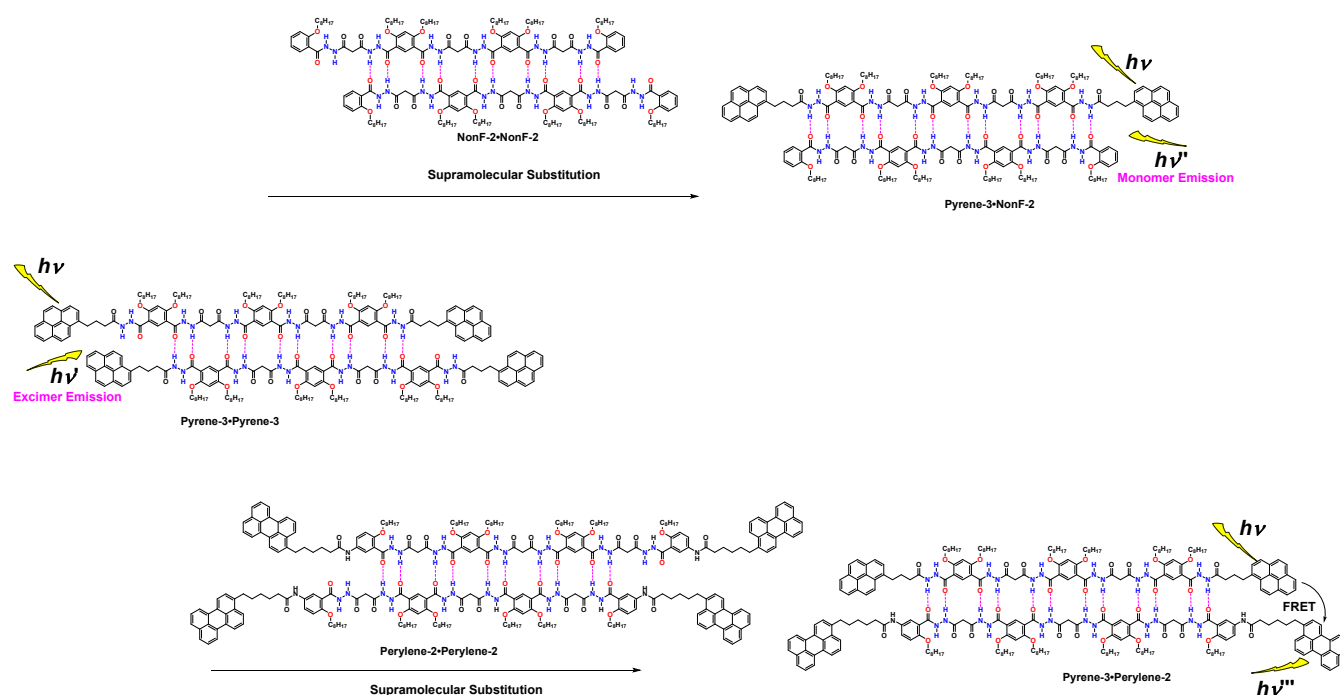

Figure S18 Representation of supramolecular substitution reactions from ten-hydrogen-bonded homoduplexes to twelve-hydrogen-bonded heteroduplexes between oligomers **Pyrene-3** & **NonF-2**, and **Pyrene-3** & **Perylene-2**, leading to excimer-monomer emission transition and FRET respectively.

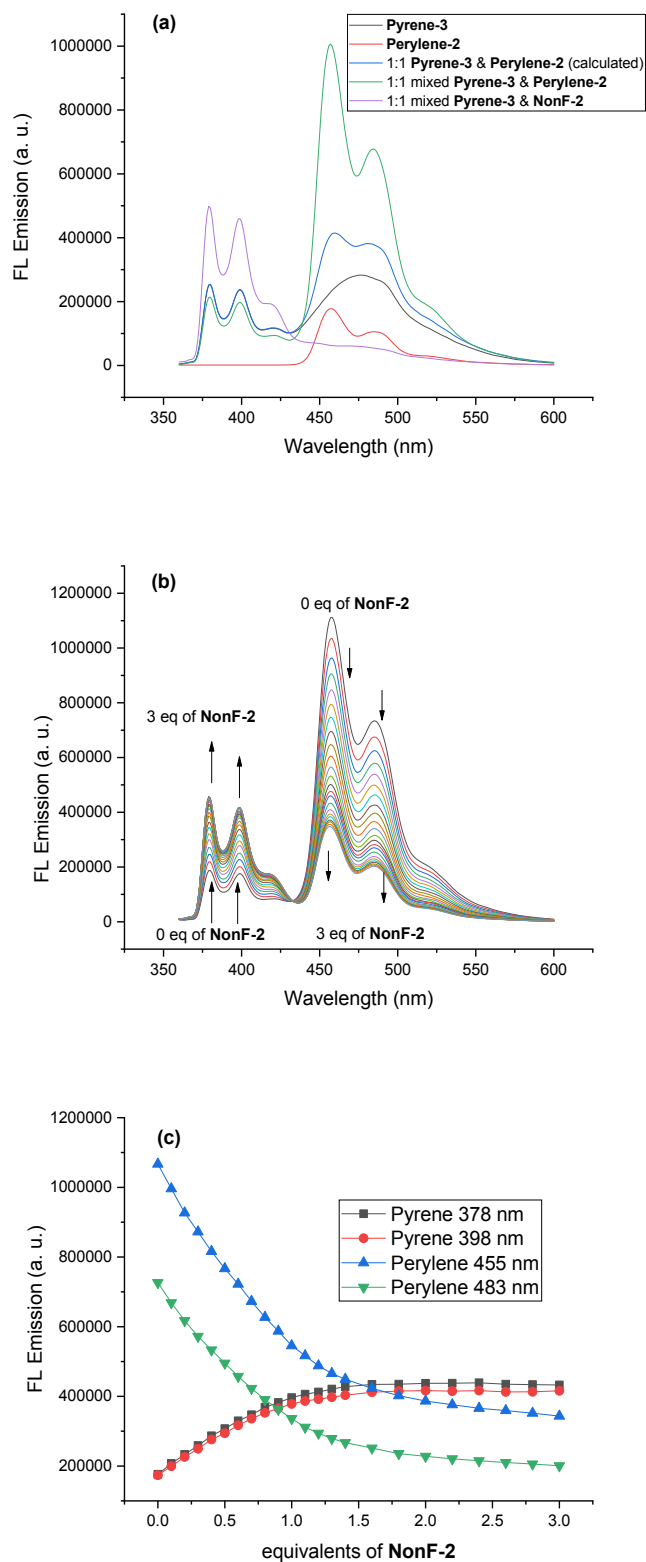

Figure S19 (a) FL emission spectra for **Pyrene-3**, **Perylene-2**, addition spectrum for **Pyrene-3 & Perylene-2**, 1:1 mixture of **Pyrene-3 & Perylene-2**, and 1:1 mixture of **Pyrene-3 & NonF-2**, each 1  $\mu\text{M}$  in  $\text{CHCl}_3$ , 293 K,  $\lambda_{\text{ex}} = 345$  nm. (b) FL emission spectra for 1:1 mixture of **Pyrene-3 & Perylene-2**, titrated with a nonfluorescent oligomer **NonF-2** (0 ~ 3 equivalents),  $\lambda_{\text{ex}} = 345$  nm. (c) Increase of pyrene monomer emission (378 nm and 398 nm) and decrease of perylene monomer emission with addition of **NonF-2** (455 nm and 483 nm),  $\lambda_{\text{isobestic}} = 432$  nm.

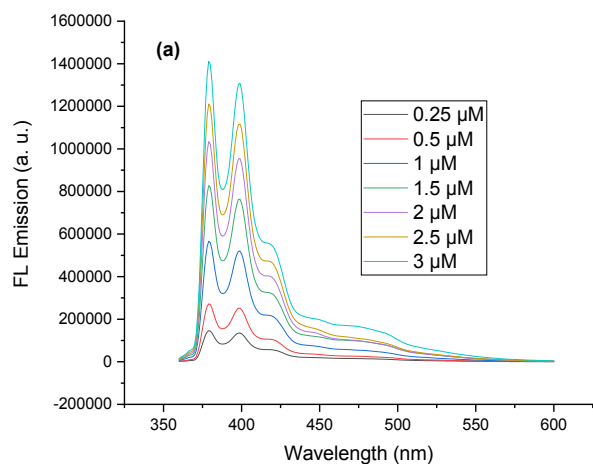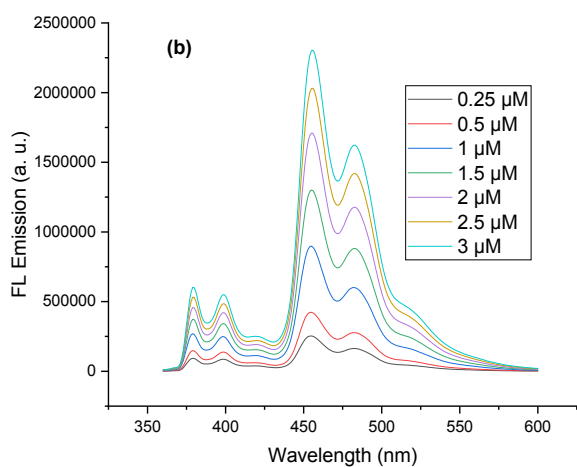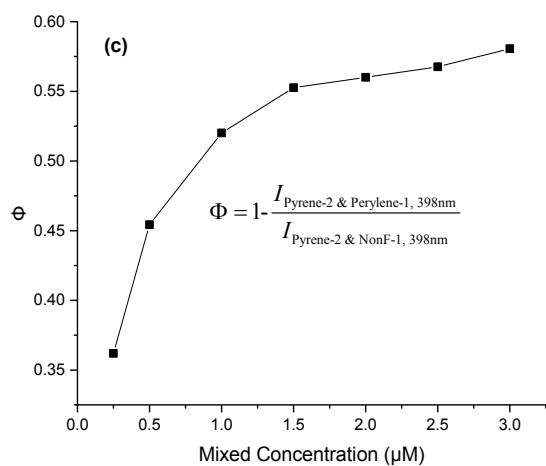

Figure S20 (a) FL emission spectra for 1:1 mixed **Pyrene-2 & NonF-1**, from 0.25  $\mu\text{M}$  to 3  $\mu\text{M}$  in freshly distilled  $\text{CHCl}_3$ ,  $\lambda_{\text{ex}} = 345 \text{ nm}$ , 20  $^\circ\text{C}$ . (b) FL emission spectra for 1:1 mixed **Pyrene-2 & Perylene-1**, from 0.25  $\mu\text{M}$  to 3  $\mu\text{M}$  in freshly distilled  $\text{CHCl}_3$ ,  $\lambda_{\text{ex}} = 345 \text{ nm}$ , 20  $^\circ\text{C}$ . (c) Energy transfer efficiency  $\Phi$  between **Pyrene-2 & Perylene-1** vs mixed concentration.  $\Phi$  was measured as the fluorescence intensity change at  $\lambda = 398 \text{ nm}$ .

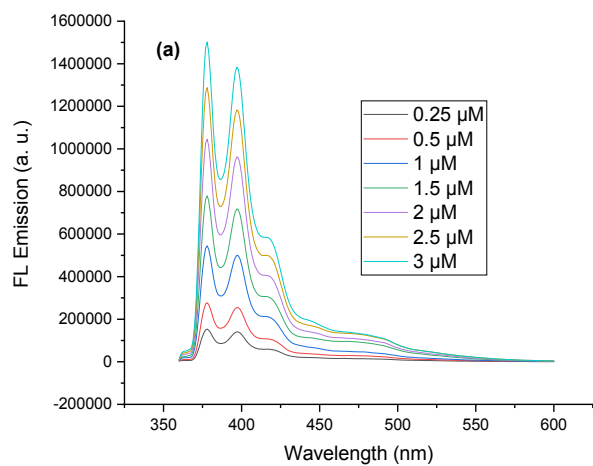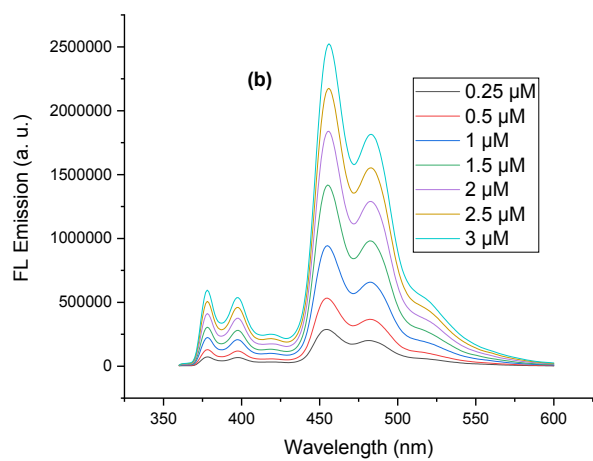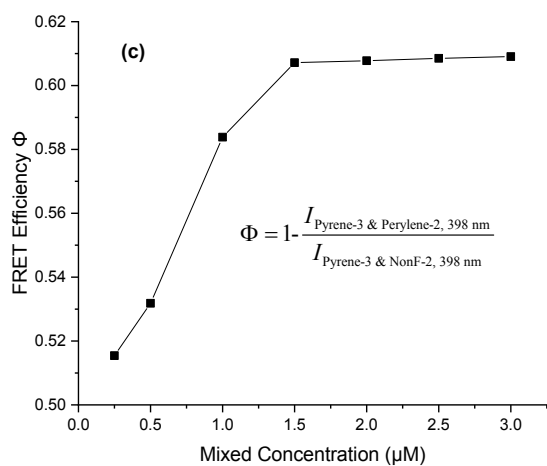

Figure S21 (a) FL emission spectra for 1:1 mixed **Pyrene-3 & NonF-2**, from 0.25  $\mu\text{M}$  to 3  $\mu\text{M}$  in freshly distilled  $\text{CHCl}_3$ ,  $\lambda_{\text{ex}} = 345 \text{ nm}$ , 20  $^\circ\text{C}$ . (b) FL emission spectra for 1:1 mixed **Pyrene-3 & Perylene-2**, from 0.25  $\mu\text{M}$  to 3  $\mu\text{M}$  in freshly distilled  $\text{CHCl}_3$ ,  $\lambda_{\text{ex}} = 345 \text{ nm}$ , 20  $^\circ\text{C}$ . (c) Energy transfer efficiency  $\Phi$  between **Pyrene-3 & Perylene-2** vs mixed concentration.  $\Phi$  was measured as the fluorescence intensity change at  $\lambda = 398 \text{ nm}$ .

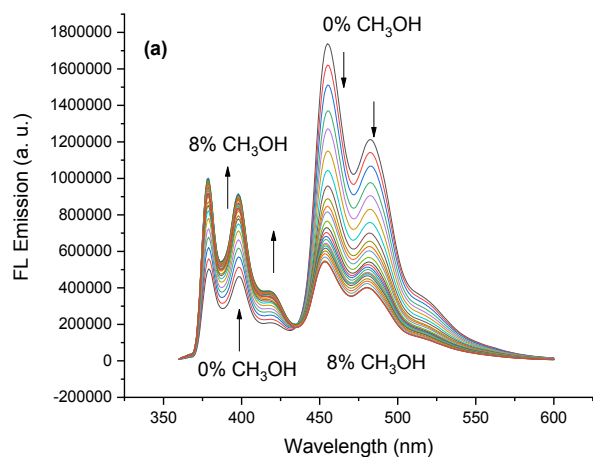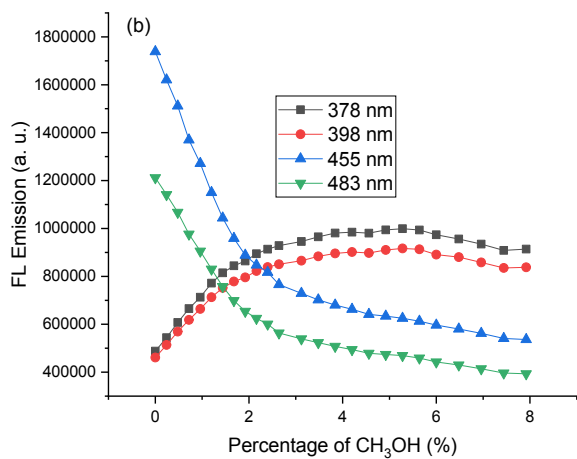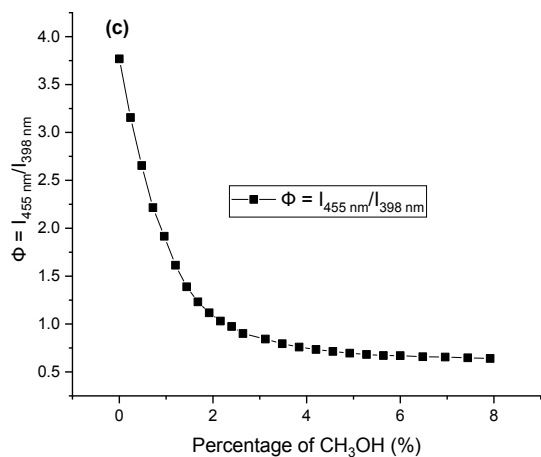

Figure S22 (a) FL emission spectra for **Pyrene-2** & **Perylene-1**, 2  $\mu\text{M}$  in freshly distilled  $\text{CHCl}_3$ , titrated with different percentage of  $\text{CH}_3\text{OH}$ ,  $\lambda_{\text{ex}} = 345 \text{ nm}$ , 20  $^\circ\text{C}$ ,  $\lambda_{\text{isobestic}} = 435 \text{ nm}$ . (b) FL intensity changes for pyrene monomer emission ( $\lambda_{\text{max}} = 378 \text{ nm}$  and  $\lambda_{\text{max}} = 398 \text{ nm}$ ) and perylene monomer emission ( $\lambda_{\text{max}} = 455 \text{ nm}$  and  $\lambda_{\text{max}} = 483 \text{ nm}$ ). (c) Energy transfer efficiency  $\Phi$  between **Pyrene-2** and **Perylene-1**, expressed as the ratio of fluorescence intensities at  $\lambda = 455 \text{ nm}$  (acceptor) and  $\lambda = 398 \text{ nm}$  (donor). 3%  $\text{CH}_3\text{OH}$  in  $\text{CHCl}_3$  can destroy the FRET process almost completely.



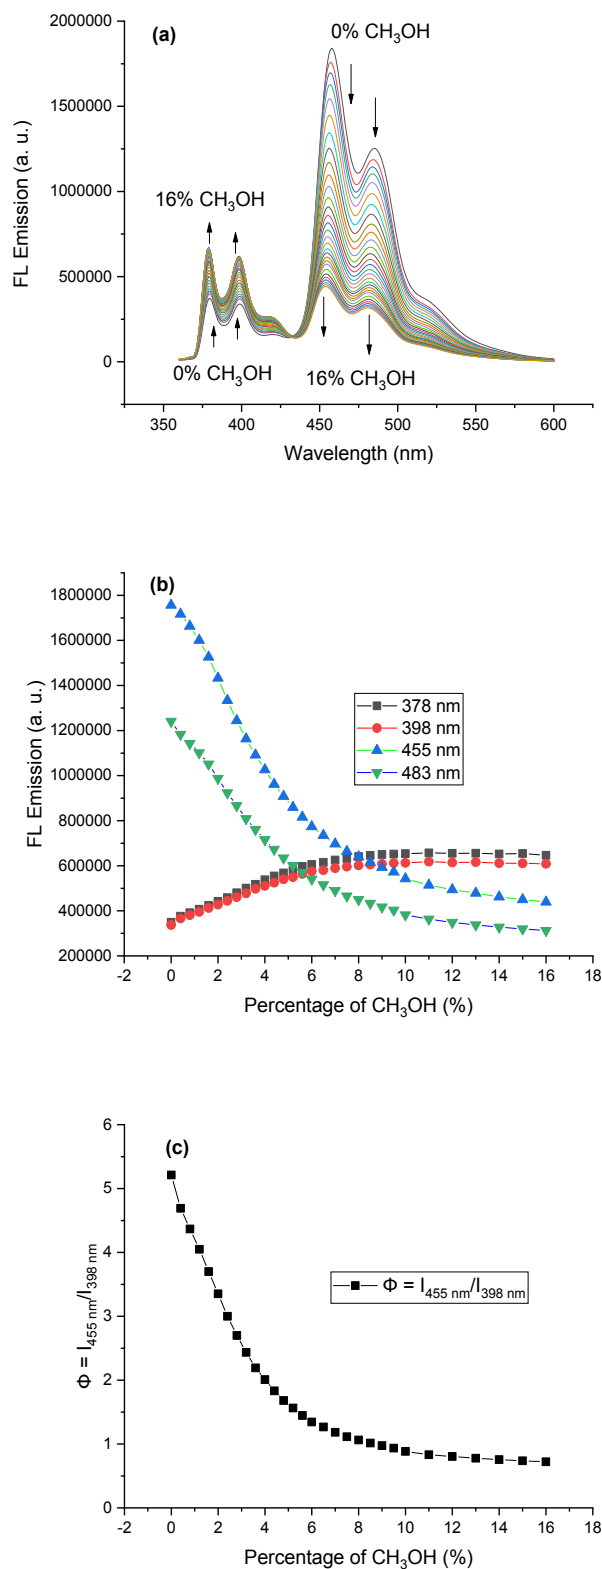

Figure S23 (a) FL emission spectra for **Pyrene-3 & Perylene-2**, 2  $\mu\text{M}$  in freshly distilled  $\text{CHCl}_3$ , titrated with different percentage of  $\text{CH}_3\text{OH}$ ,  $\lambda_{\text{ex}} = 345 \text{ nm}$ ,  $20 \text{ }^\circ\text{C}$ ,  $\lambda_{\text{isobestic}} = 435 \text{ nm}$ . (b) FL intensity changes for pyrene monomer emission ( $\lambda_{\text{max}} = 378 \text{ nm}$  and  $\lambda_{\text{max}} = 398 \text{ nm}$ ) and perylene monomer emission ( $\lambda_{\text{max}} = 455 \text{ nm}$  and  $\lambda_{\text{max}} = 483 \text{ nm}$ ). (c) Energy transfer efficiency  $\Phi$  between **Pyrene-2** and **Perylene-1**, expressed as the ratio of fluorescence intensities at  $\lambda = 455 \text{ nm}$  (acceptor) and  $\lambda = 398 \text{ nm}$  (donor). 6%  $\text{CH}_3\text{OH}$  in  $\text{CHCl}_3$  can destroy the FRET process almost completely.

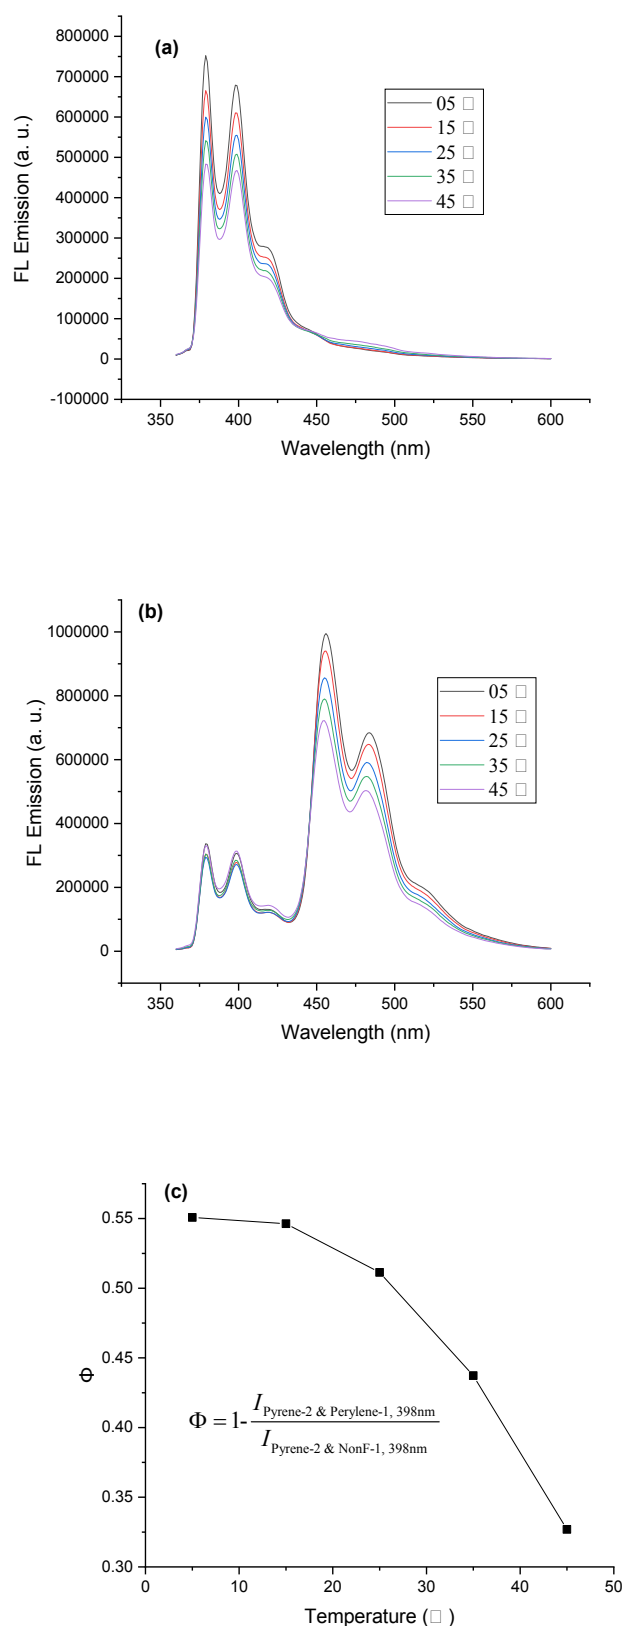

Figure S24 (a) Temperature dependent FL emission spectra for 1:1 mixed **Pyrene-2 & NonF-1**, from 5 °C to 45 °C, 1  $\mu$ M in freshly distilled  $\text{CHCl}_3$ ,  $\lambda_{\text{ex}} = 345$  nm. (b) Temperature dependent FL emission spectra for 1:1 mixed **Pyrene-2 & Perylene-1**, from 5 °C to 45 °C, 1  $\mu$ M in freshly distilled  $\text{CHCl}_3$ ,  $\lambda_{\text{ex}} = 345$  nm. (c) Energy transfer efficiency  $\Phi$  between **Pyrene-2 & Perylene-1** vs temperature.  $\Phi$  was measured as the fluorescence intensity change at  $\lambda = 398$  nm.

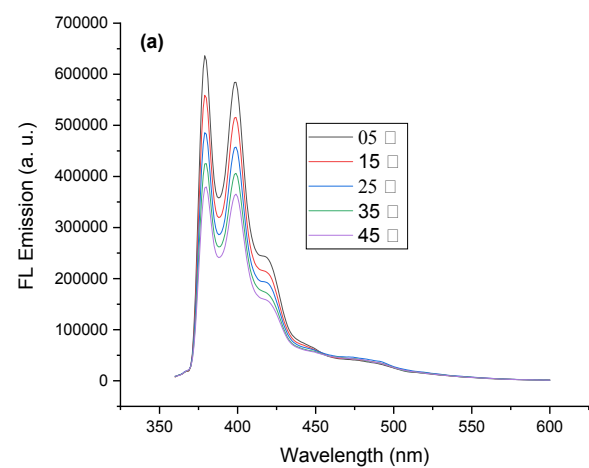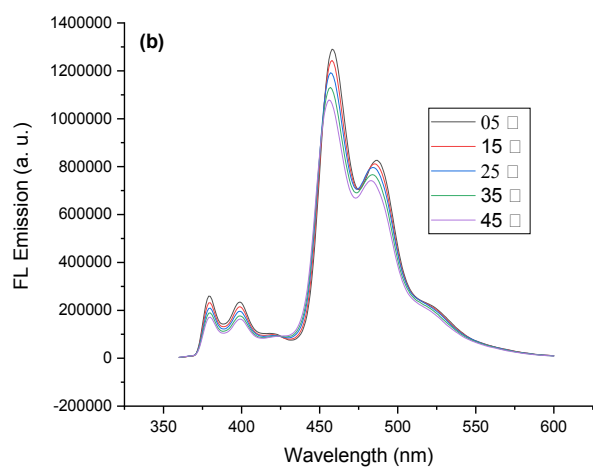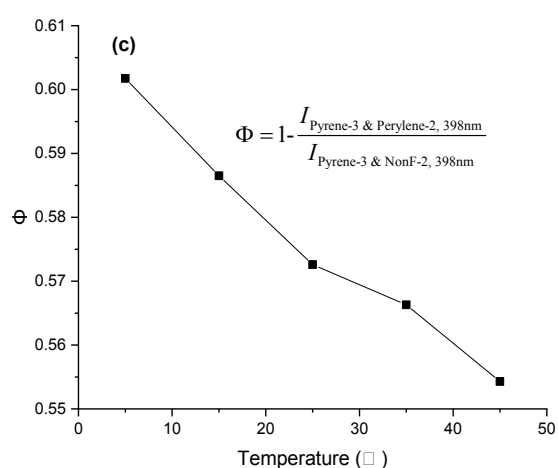

Figure S25 (a) Temperature dependent FL emission spectra for 1:1 mixed **Pyrene-3 & NonF-2**, from 5 °C to 45 °C, 1  $\mu$ M in freshly distilled  $\text{CHCl}_3$ ,  $\lambda_{\text{ex}} = 345$  nm. (b) Temperature dependent FL emission spectra for 1:1 mixed **Pyrene-3 & Perylene-2**, from 5 °C to 45 °C, 1  $\mu$ M in freshly distilled  $\text{CHCl}_3$ ,  $\lambda_{\text{ex}} = 345$  nm. (c) Energy transfer efficiency  $\Phi$  between **Pyrene-3 & Perylene-2** vs temperature.  $\Phi$  was measured as the fluorescence intensity change at  $\lambda = 398$  nm.

## References

- S1 S. H. M. Söntjens, R. P. Sijbesma, M. H. P. van Genderen and E. W. Meijer, Stability and lifetime of quadruply hydrogen bonded 2-ureido-4[1H]-pyrimidinone dimers, *J. Am. Chem. Soc.*, 2000, **122**, 7487-7493.
- S2 Y.-X. Xu, T.-G. Zhan, X. Zhao and Z.-T. Li, Hydrogen bonding-driven highly stable homoduplexes formed by benzene/naphthalene amide oligomers, *Org. Chem. Front.*, 2014, **1**, 73-78.
- S3 H. Zeng, X. Yang, A. L. Brown, S. Martinovic, R. D. Smith and B. Gong, An extremely stable, self-complementary hydrogen-bonded duplex, *Chem. Commun.*, 2003, 1556-1557.
